# Supplementary material for: An EBV recombinant deleted for residues 130-159 in EBNA3C can deregulate p53/Mdm2 and Cyclin D1/CDK6 which results in apoptosis and reduced cell proliferation
Source: PubMed Central journal article supplement (PMC4951276; doi:10.18632/oncotarget.7502), 2016-02-19
Supplement: oncotarget-07-18116-s001.pdf [file oncotarget-07-18116-s001.pdf]

**SUPPLEMENTARY FIGURE AND TABLE**

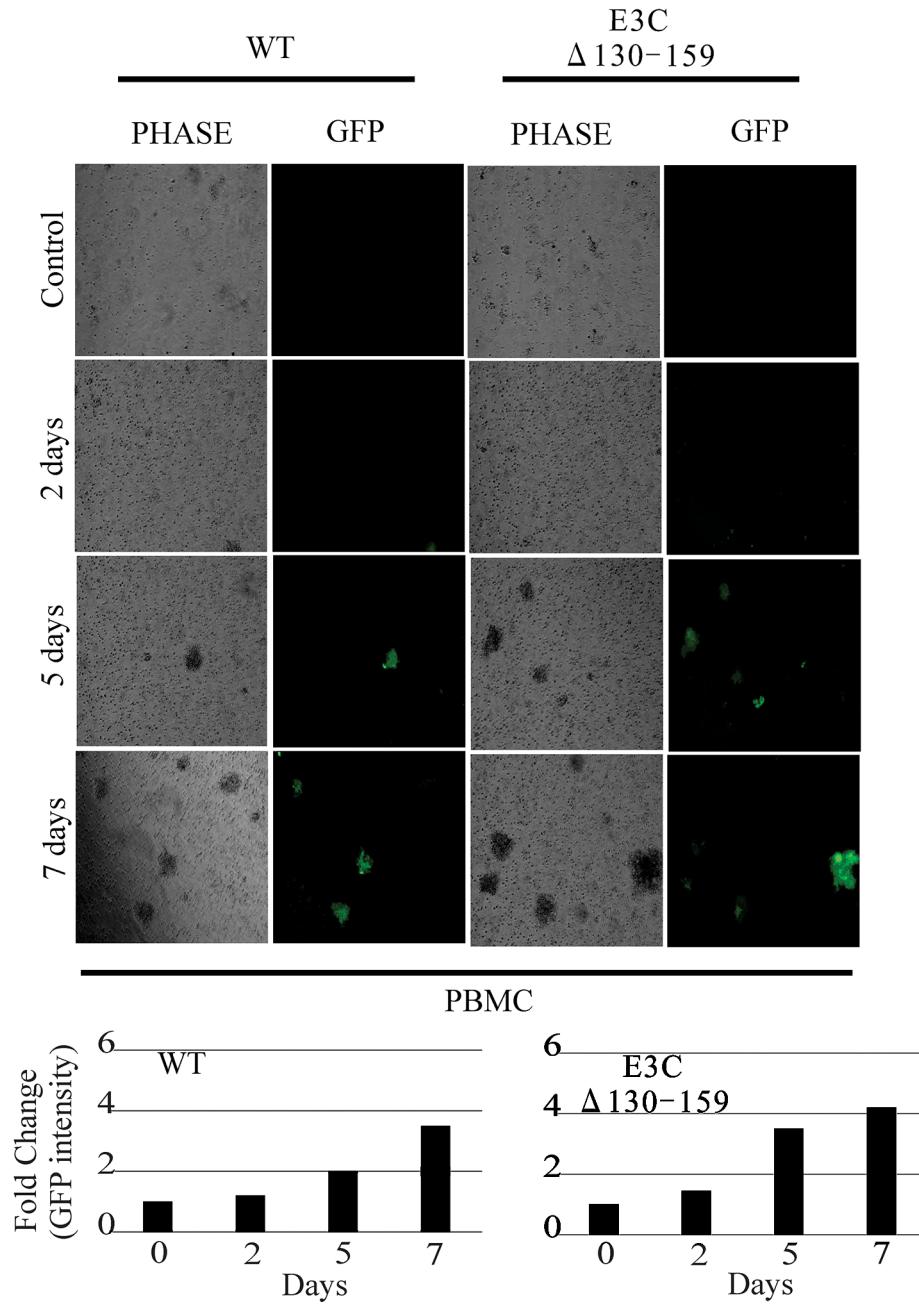

**Supplementary Figure S1: BACEBV-GFPWT and EBVGFP $\Delta$ E3C130-159 infection in PBMCs.** PBMCs were infected with BACEBV-GFPWT (WT) and deleted residue of (EBVGFP $\Delta$ E3C130-159) 130-159 for EBNA3C. Microscopy were performed in days dependent manner as there viruses have GFP signals. Quantitation of GFP plotted according to images represented in figure.

**Supplementary Table S1: Primer and oligo sequences****EBV delta E3C 130-159 galk insertion cassette [galk sequence Underlined]**

|           |                                                                                |
|-----------|--------------------------------------------------------------------------------|
| Sense     | ATGCTGCCTGCCGGGCTGTCAAGCAATCGCACCTGCAAGCG<br>CTATCAAACCCTGTTGACAATTAATCATCGGCA |
| Antisense | GGAGATGTTAGAAGCCAATGTCGCCAACCCACACCCGCCCTC<br>CGCAACCAATCAGCACTGTCCTGCTCCTT    |

**EBV delta E3C 130-159 galk removal cassette [100 bp]**

|           |                                                                                                                |
|-----------|----------------------------------------------------------------------------------------------------------------|
| Sense     | ATGCTGCCTGCCGGGCTGTCAAGCAATCGCACCTGCAAGCG<br>CTATCAAACCTTGGTTGCGGAGGGCGGTGTGGGTTGGCGACA<br>TTGGCTTCTAACATCTCC  |
| Antisense | GGAGATGTTAGAAGCCAATGTCGCCAACCCACACCCGCCCTC<br>CGCAACCAAGTTTGATAGCGCTTGCAGGTGCGATTGCTTGAC<br>AGCCCCGGCAGGCAGCAT |

**EBNA3C 130-159 (Junction PCR)**

|           |                          |
|-----------|--------------------------|
| Sense     | GCATCAGGCGAAGGCGGAGAAGAC |
| Antisense | CTGGCTGCCATCACGAAGCACAAG |

**EBNA-1**

|           |                           |
|-----------|---------------------------|
| Sense     | CATTGAGTCGTCTCCCCTTTGGAAT |
| Antisense | TCATAACAAGGTCCTTAATCGCATC |

**P53**

|           |                         |
|-----------|-------------------------|
| Sense     | CCT GAGGTTGGCTCTGACTGTA |
| Antisense | TCCGTCCCAGTAGATTACCAC   |

**MDM-2**

|           |                                 |
|-----------|---------------------------------|
| Sense     | CCGGAATTCATGAGTGTGGAATCTAGTTTGC |
| Antisense | ATAAGAATGCGGCCGCGGGAAATAAGTTAGC |

**Cyclin D1**

|           |                      |
|-----------|----------------------|
| Sense     | AGTTGTTGGGGCTCCTCAG  |
| Antisense | TCTGGAGAGGAAGCGTGTGA |

**pRb**

|           |                        |
|-----------|------------------------|
| Sense     | CAGAAGGCAACTTGACAAGAGA |
| Antisense | CCTTCTCGGTCCTTTGATTG   |

**E2F1**

|           |                        |
|-----------|------------------------|
| Sense     | GGCCAGGTAAGTATGATGGTCA |
| Antisense | GACCCTGACCTGCTGCTCT    |

**GAPDH**

|           |                     |
|-----------|---------------------|
| Sense     | TGCACCACCAACTGCTTAG |
| Antisense | GATGCAGGGATGATGTTC  |
